# Supplementary material
Source: PubMed Central journal article supplement (PMC6235778)

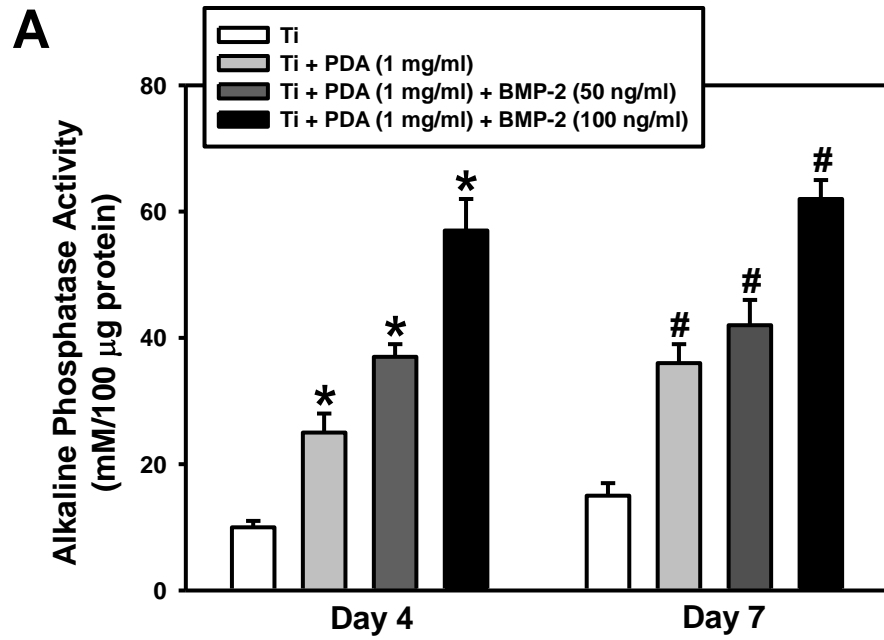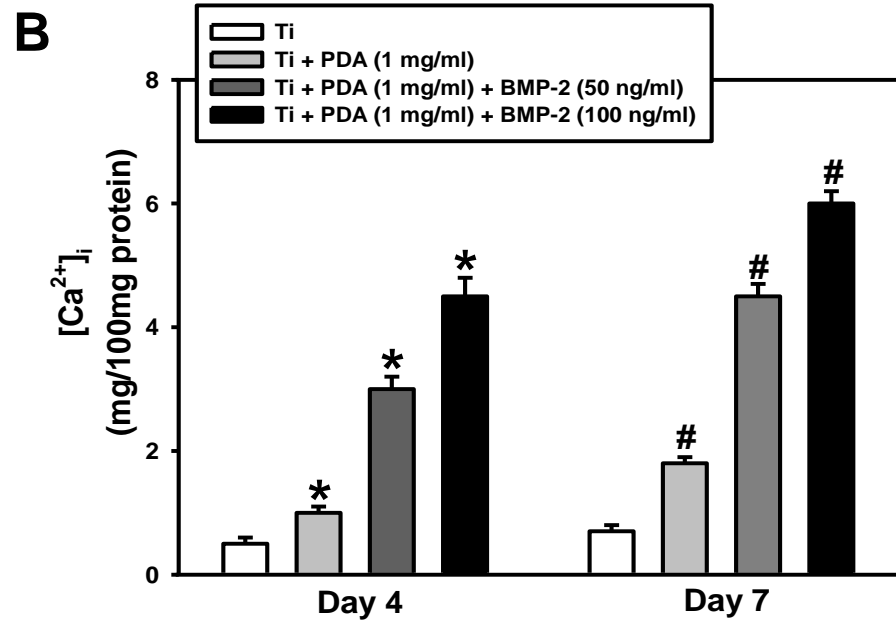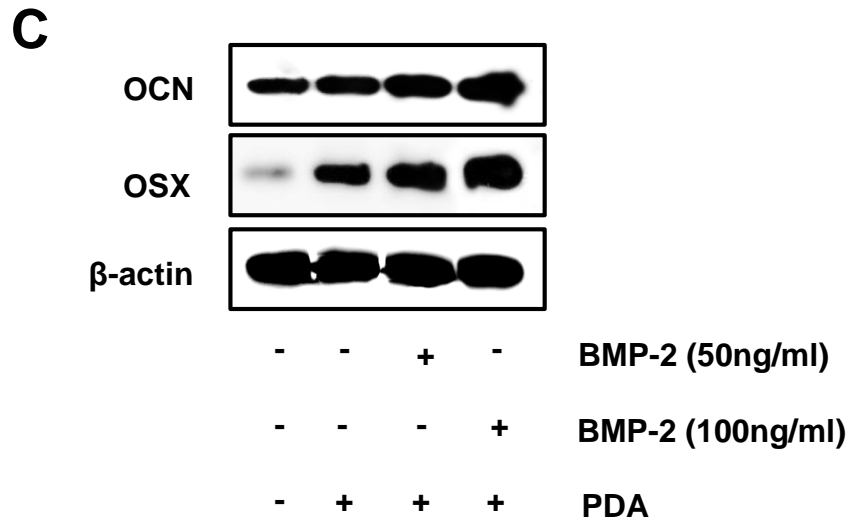

Supplement: 12079_2018_468_MOESM1_ESM.pdf [file 12079_2018_468_MOESM1_ESM.pdf]
